# Supplementary material
Source: PubMed Central journal article supplement (PMC3993337)

**Supplemental Table 1: *Salmonella enterica* serovar Typhimurium LT2 and ATCC 14028s (ST14028) strains used in this study.**

| <b>Strains &amp; Plasmids</b> | <b>Relevant characteristics</b>                                                                                                                                                                      | <b>Reference or source</b> |
|-------------------------------|------------------------------------------------------------------------------------------------------------------------------------------------------------------------------------------------------|----------------------------|
| EM3                           | LT2 $\Delta araBAD1065::hilD^+$ <i>rflM3::MudJ</i><br>$\Delta invH-sprB::FCF$                                                                                                                        | This study                 |
| EM4                           | LT2 $\Delta araBAD1065::hilD^+$ <i>flhC5213::MudJ</i><br>$\Delta invH-sprB::FCF$                                                                                                                     | This study                 |
| EM20                          | LT2 $\Delta araBAD1065::hilD^+$ <i>rflM3::MudJ</i><br>$\Delta invH-sprB::FCF$ <i>rtsB::TPOP</i>                                                                                                      | This study                 |
| EM43                          | LT2 $\Delta araBAD1065::hilD^+$ <i>rtsB::T-POP</i><br><i>flhC5213::MudJ</i> $\Delta invH-sprB$ ( $\Delta spi-1$ )                                                                                    | This study                 |
| EM50                          | LT2 $\Delta araBAD1065::hilD^+$ <i>rflM3::MudJ</i><br>$\Delta invH-sprB::FCF$ <i>rtsB::TPOP</i><br>$\Delta flhDC7902::FRT$                                                                           | This study                 |
| EM97                          | LT2 $\Delta araBAD925::tetRA$ <i>flhC5213::MudJ</i><br>$\Delta invH-sprB::FCF$                                                                                                                       | This study                 |
| EM517                         | LT2 $\Delta araBAD1005::FRT$ <i>flhC5213::MudJ</i>                                                                                                                                                   | This study                 |
| EM640                         | 14028s $\Delta araBAD1065::hilD^+$ <i>flhC5213::MudJ</i>                                                                                                                                             | This study                 |
| EM665                         | 14028s $\Delta araBAD1005::FRT$ <i>flhC5213::MudJ</i>                                                                                                                                                | This study                 |
| EM667                         | 14028s $\Delta araBAD1065::hilD^+$ <i>flhC5213::MudJ</i><br>$\Delta invH-sprB::FCF$                                                                                                                  | This study                 |
| EM674                         | 14028s $\Delta araBAD1005::FRT$ <i>flhC5213::MudJ</i><br>$\Delta invH-sprB::FCF$                                                                                                                     | This study                 |
| EM706                         | LT2 P( <i>flhDC</i> )8093 (P <i>flhDC</i> - <i>luxCDBAE</i> -Km-<br>P <i>flhDC</i> <sup>+</sup> ) $\Delta araBAD1005::FRT$                                                                           | This study                 |
| EM707                         | LT2 P( <i>flhDC</i> )8124 (P <i>flhDC</i> P1+ (-10 of<br>P2,P3,P4,P5,P6 changed to GTTGGT)-<br><i>luxCDBAE</i> -Km-P <i>flhDC</i> <sup>+</sup> ) $\Delta araBAD::FRT$                                | This study                 |
| EM708                         | LT2 P( <i>flhDC</i> )8125 (P <i>flhDC</i> P2+ (-10 of<br>P1,P3,P4,P5,P6 changed to GTTGGT)-<br><i>luxCDBAE</i> -Km-P <i>flhDC</i> <sup>+</sup> ) $\Delta araBAD1005::FRT$                            | This study                 |
| EM709                         | LT2 P( <i>flhDC</i> )8126 (P <i>flhDC</i> P3+ (-10 of<br>P1,P2,P4,P5,P6 changed to GTTGGT)-<br><i>luxCDBAE</i> -Km-P <i>flhDC</i> <sup>+</sup> ) $\Delta araBAD1005::FRT$                            | This study                 |
| EM710                         | LT2 P( <i>flhDC</i> )8127 (P <i>flhDC</i> P4+ (-10 of<br>P1,P2,P3,P5,P6 changed to GTTGGT)-<br><i>luxCDBAE</i> -Km-P <i>flhDC</i> <sup>+</sup> ) $\Delta araBAD1005::FRT$                            | This study                 |
| EM711                         | LT2 P( <i>flhDC</i> )8128 (P <i>flhDC</i> P5+ (-10 of<br>P1,P2,P3,P4,P6 changed to GTTGGT)-<br><i>luxCDBAE</i> -Km-P <i>flhDC</i> <sup>+</sup> ) $\Delta araBAD1005::FRT$<br>$\Delta invH-sprB::FCF$ | This study                 |
| EM712                         | LT2 P( <i>flhDC</i> )8129 (P <i>flhDC</i> P6+ (-10 of<br>P1,P2,P3,P4,P5 changed to GTTGGT)-                                                                                                          | This study                 |

|       |                                                                                                                                                                                                 |            |
|-------|-------------------------------------------------------------------------------------------------------------------------------------------------------------------------------------------------|------------|
|       | <i>luxCDBAE-Km-PflhDC<sup>+</sup></i> $\Delta$ <i>araBAD1005::FRT</i>                                                                                                                           |            |
| EM713 | LT2 P( <i>flhDC</i> )8093 ( <i>PflhDC-luxCDBAE-Km-PflhDC<sup>+</sup></i> ) $\Delta$ <i>araBAD1065::hilD<sup>+</sup></i>                                                                         | This study |
| EM714 | LT2 P( <i>flhDC</i> )8124 ( <i>PflhDC</i> P1+ (-10 of P2,P3,P4,P5,P6 changed to GTTGGT)- <i>luxCDBAE-Km-PflhDC<sup>+</sup></i> ) $\Delta$ <i>araBAD1065::hilD<sup>+</sup></i>                   | This study |
| EM715 | LT2 P( <i>flhDC</i> )8125 ( <i>PflhDC</i> P2+ (-10 of P1,P3,P4,P5,P6 changed to GTTGGT)- <i>luxCDBAE-Km-PflhDC<sup>+</sup></i> ) $\Delta$ <i>araBAD1065::hilD<sup>+</sup></i>                   | This study |
| EM716 | LT2 P( <i>flhDC</i> )8126 ( <i>PflhDC</i> P3+ (-10 of P1,P2,P4,P5,P6 changed to GTTGGT)- <i>luxCDBAE-Km-PflhDC<sup>+</sup></i> ) $\Delta$ <i>araBAD1065::hilD<sup>+</sup></i>                   | This study |
| EM717 | LT2 P( <i>flhDC</i> )8127 ( <i>PflhDC</i> P4+ (-10 of P1,P2,P3,P5,P6 changed to GTTGGT)- <i>luxCDBAE-Km-PflhDC<sup>+</sup></i> ) $\Delta$ <i>araBAD1065::hilD<sup>+</sup></i>                   | This study |
| EM718 | LT2 P( <i>flhDC</i> )8128 ( <i>PflhDC</i> P5+ (-10 of P1,P2,P3,P4,P6 changed to GTTGGT)- <i>luxCDBAE-Km-PflhDC<sup>+</sup></i> ) $\Delta$ <i>araBAD1065::hilD<sup>+</sup></i>                   | This study |
| EM719 | LT2 P( <i>flhDC</i> )8129 ( <i>PflhDC</i> P6+ (-10 of P1,P2,P3,P4,P5 changed to GTTGGT)- <i>luxCDBAE-Km-PflhDC<sup>+</sup></i> ) $\Delta$ <i>araBAD1065::hilD<sup>+</sup></i>                   | This study |
| EM734 | LT2 P( <i>flhDC</i> )8093 ( <i>PflhDC-luxCDBAE-Km-PflhDC<sup>+</sup></i> ) $\Delta$ <i>araBAD1005::FRT</i> $\Delta$ <i>invH-sprB::FCF</i>                                                       | This study |
| EM735 | LT2 P( <i>flhDC</i> )8124 ( <i>PflhDC</i> P1+ (-10 of P2,P3,P4,P5,P6 changed to GTTGGT)- <i>luxCDBAE-Km-PflhDC<sup>+</sup></i> ) $\Delta$ <i>araBAD::FRT</i> $\Delta$ <i>invH-sprB::FCF</i>     | This study |
| EM736 | LT2 P( <i>flhDC</i> )8125 ( <i>PflhDC</i> P2+ (-10 of P1,P3,P4,P5,P6 changed to GTTGGT)- <i>luxCDBAE-Km-PflhDC<sup>+</sup></i> ) $\Delta$ <i>araBAD1005::FRT</i> $\Delta$ <i>invH-sprB::FCF</i> | This study |
| EM737 | LT2 P( <i>flhDC</i> )8126 ( <i>PflhDC</i> P3+ (-10 of P1,P2,P4,P5,P6 changed to GTTGGT)- <i>luxCDBAE-Km-PflhDC<sup>+</sup></i> ) $\Delta$ <i>araBAD1005::FRT</i> $\Delta$ <i>invH-sprB::FCF</i> | This study |
| EM738 | LT2 P( <i>flhDC</i> )8127 ( <i>PflhDC</i> P4+ (-10 of P1,P2,P3,P5,P6 changed to GTTGGT)- <i>luxCDBAE-Km-PflhDC<sup>+</sup></i> ) $\Delta$ <i>araBAD1005::FRT</i> $\Delta$ <i>invH-sprB::FCF</i> | This study |
| EM739 | LT2 P( <i>flhDC</i> )8128 ( <i>PflhDC</i> P5+ (-10 of P1,P2,P3,P4,P6 changed to GTTGGT)- <i>luxCDBAE-Km-PflhDC<sup>+</sup></i> ) $\Delta$ <i>araBAD1005::FRT</i> $\Delta$ <i>invH-sprB::FCF</i> | This study |

|       |                                                                                                                                                                                                                |            |
|-------|----------------------------------------------------------------------------------------------------------------------------------------------------------------------------------------------------------------|------------|
| EM740 | LT2 P( <i>flhDC</i> )8129 ( <i>PflhDC</i> P6+ (-10 of P1,P2,P3,P4,P5 changed to GTTGGT)- <i>luxCDBAE-Km-PflhDC</i> <sup>+</sup> ) $\Delta$ <i>araBAD1005::FRT</i> $\Delta$ <i>invH-sprB::FCF</i>               | This study |
| EM741 | LT2 P( <i>flhDC</i> )8093 ( <i>PflhDC-luxCDBAE-Km-PflhDC</i> <sup>+</sup> ) $\Delta$ <i>araBAD1065::hilD</i> <sup>+</sup> $\Delta$ <i>invH-sprB::FCF</i>                                                       | This study |
| EM742 | LT2 P( <i>flhDC</i> )8124 ( <i>PflhDC</i> P1+ (-10 of P2,P3,P4,P5,P6 changed to GTTGGT)- <i>luxCDBAE-Km-PflhDC</i> <sup>+</sup> ) $\Delta$ <i>araBAD1065::hilD</i> <sup>+</sup> $\Delta$ <i>invH-sprB::FCF</i> | This study |
| EM743 | LT2 P( <i>flhDC</i> )8125 ( <i>PflhDC</i> P2+ (-10 of P1,P3,P4,P5,P6 changed to GTTGGT)- <i>luxCDBAE-Km-PflhDC</i> <sup>+</sup> ) $\Delta$ <i>araBAD1065::hilD</i> <sup>+</sup> $\Delta$ <i>invH-sprB::FCF</i> | This study |
| EM744 | LT2 P( <i>flhDC</i> )8126 ( <i>PflhDC</i> P3+ (-10 of P1,P2,P4,P5,P6 changed to GTTGGT)- <i>luxCDBAE-Km-PflhDC</i> <sup>+</sup> ) $\Delta$ <i>araBAD1065::hilD</i> <sup>+</sup> $\Delta$ <i>invH-sprB::FCF</i> | This study |
| EM745 | LT2 P( <i>flhDC</i> )8127 ( <i>PflhDC</i> P4+ (-10 of P1,P2,P3,P5,P6 changed to GTTGGT)- <i>luxCDBAE-Km-PflhDC</i> <sup>+</sup> ) $\Delta$ <i>araBAD1065::hilD</i> <sup>+</sup> $\Delta$ <i>invH-sprB::FCF</i> | This study |
| EM746 | LT2 P( <i>flhDC</i> )8128 ( <i>PflhDC</i> P5+ (-10 of P1,P2,P3,P4,P6 changed to GTTGGT)- <i>luxCDBAE-Km-PflhDC</i> <sup>+</sup> ) $\Delta$ <i>araBAD1065::hilD</i> <sup>+</sup> $\Delta$ <i>invH-sprB::FCF</i> | This study |
| EM747 | LT2 P( <i>flhDC</i> )8129 ( <i>PflhDC</i> P6+ (-10 of P1,P2,P3,P4,P5 changed to GTTGGT)- <i>luxCDBAE-Km-PflhDC</i> <sup>+</sup> ) $\Delta$ <i>araBAD1065::hilD</i> <sup>+</sup> $\Delta$ <i>invH-sprB::FCF</i> | This study |
| EM801 | LT2 $\Delta$ <i>araBAD1065::hilD</i> <sup>+</sup> <i>fljB5001::MudJ</i> $\Delta$ <i>hin-5718::FRT</i> <i>PflhDC5451::Tn10dTc[del-25]</i>                                                                       | This study |
| EM802 | LT2 $\Delta$ <i>araBAD1065::hilD</i> <sup>+</sup> <i>fliL5100::MudJ</i> <i>PflhDC5451::Tn10dTc[del-25]</i>                                                                                                     | This study |
| EM804 | LT2 $\Delta$ <i>araBAD1065::hilD</i> <sup>+</sup> <i>flhC5213::MudJ</i> <i>PflhDC5451::Tn10dTc[del-25]</i>                                                                                                     | This study |
| EM827 | LT2 $\Delta$ <i>araBAD1005::FRT</i> <i>flhC::MudJ</i> $\Delta$ <i>invH-sprB::FCF</i> ( $\Delta$ <i>spi-1</i> )                                                                                                 | This study |
| EM858 | LT2 $\Delta$ <i>araBAD1182::hilD</i> $\Delta$ HTH <i>PflhDC5451::Tn10dTc[del-25]</i> <i>flhC5213::MudJ</i>                                                                                                     | This study |
| EM868 | LT2 $\Delta$ <i>araBAD1182::hilD</i> $\Delta$ HTH <i>P(flhDC)5451::Tn10dTc[del-25]</i>                                                                                                                         | This study |

|         |                                                                                                                                                                                          |                |
|---------|------------------------------------------------------------------------------------------------------------------------------------------------------------------------------------------|----------------|
|         | <i>fliL5100::MudJ</i>                                                                                                                                                                    |                |
| EM869   | LT2 $\Delta$ <i>araBAD1182::hilD<math>\Delta</math>HTH<br/><i>P(flhDC)5451::Tn10dTc[del-25]</i><br/><i>fljB5001::MudJ</i> <math>\Delta</math><i>hin-5718::FRT</i></i>                    | This study     |
| EM885   | LT2 $\Delta$ <i>araBAD1182::hilD<math>\Delta</math>HTH<br/><i>fljB5001::MudJ</i> <math>\Delta</math><i>hin-5718::FCF</i></i>                                                             | This study     |
| EM886   | LT2 $\Delta$ <i>araBAD1182::hilD<math>\Delta</math>HTH<br/><i>flhC5213::MudJ</i></i>                                                                                                     | This study     |
| EM887   | LT2 $\Delta$ <i>araBAD1182::hilD<math>\Delta</math>HTH<br/><i>fliL5100::MudJ</i></i>                                                                                                     | This study     |
| EM937   | LT2 $\Delta$ <i>araBAD1005::FRT</i> <i>rtsB::T-POP</i><br><i>flhC5213::MudJ</i> $\Delta$ <i>invH-sprB::FCF (<math>\Delta</math><i>spi-1</i>)</i>                                         | This study     |
| EM1009  | LT2 $\Delta$ <i>araBAD1183::hila<sup>+</sup></i> <i>fljB5001::MudJ</i>                                                                                                                   | This study     |
| EM1010  | LT2 $\Delta$ <i>araBAD1005::FRT</i> <i>fljB5001::MudJ</i>                                                                                                                                | This study     |
| EM1011  | LT2 $\Delta$ <i>araBAD1183::hila<sup>+</sup></i> <i>flhC5213::MudJ</i>                                                                                                                   | This study     |
| EM1018  | LT2 $\Delta$ <i>araBAD1005::FRT</i> <i>fliL5100::MudJ</i>                                                                                                                                | This study     |
| EM1019  | LT2 $\Delta$ <i>araBAD1183::hila<sup>+</sup></i> <i>fliL5100::MudJ</i>                                                                                                                   | This study     |
| EM1048  | LT2 <i>P(flhDC)8093</i> ( <i>PflhDC-luxCDBAE-Km-PflhDC<sup>+</sup></i> ) $\Delta$ <i>araBAD1065::hilD<sup>+</sup></i>                                                                    | This study     |
| EM1049  | LT2 <i>P(flhDC)8124</i> ( <i>PflhDC</i> P1+ (-10 of P2,P3,P4,P5,P6 changed to GTTGGT)- <i>luxCDBAE-Km-PflhDC<sup>+</sup></i> ) $\Delta$ <i>araBAD1109::rtsB<sup>+</sup></i>              | This study     |
| EM1050  | LT2 <i>P(flhDC)8125</i> ( <i>PflhDC</i> P2+ (-10 of P1,P3,P4,P5,P6 changed to GTTGGT)- <i>luxCDBAE-Km-PflhDC<sup>+</sup></i> ) $\Delta$ <i>araBAD1109::rtsB<sup>+</sup></i>              | This study     |
| EM1051  | LT2 <i>P(flhDC)8126</i> ( <i>PflhDC</i> P3+ (-10 of P1,P2,P4,P5,P6 changed to GTTGGT)- <i>luxCDBAE-Km-PflhDC<sup>+</sup></i> ) $\Delta$ <i>araBAD1109::rtsB<sup>+</sup></i>              | This study     |
| EM1052  | LT2 <i>P(flhDC)8127</i> ( <i>PflhDC</i> P4+ (-10 of P1,P2,P3,P5,P6 changed to GTTGGT)- <i>luxCDBAE-Km-PflhDC<sup>+</sup></i> ) $\Delta$ <i>araBAD1109::rtsB<sup>+</sup></i>              | This study     |
| EM1053  | LT2 <i>P(flhDC)8128</i> ( <i>PflhDC</i> P5+ (-10 of P1,P2,P3,P4,P6 changed to GTTGGT)- <i>luxCDBAE-Km-PflhDC<sup>+</sup></i> ) $\Delta$ <i>araBAD1109::rtsB<sup>+</sup></i>              | This study     |
| EM1054  | LT2 <i>P(flhDC)8129</i> ( <i>PflhDC</i> P6+ (-10 of P1,P2,P3,P4,P5 changed to GTTGGT)- <i>luxCDBAE-Km-PflhDC<sup>+</sup></i> ) $\Delta$ <i>araBAD1109::rtsB<sup>+</sup></i>              | This study     |
| TH3923  | LT2 pJS28(Ap <sup>R</sup> P22-9 <sup>+</sup> )/F'114 <sup>ts</sup> Lac <sup>+</sup> <i>zzf-20::Tn10[tetA::MudP](Tc<sup>S</sup>)</i> <i>zzf-3823::Tn10dTc[del-25]/leuA414 hsdSB Fels2</i> | Lab collection |
| TH6701  | LT2 $\Delta$ <i>araBAD925::tetRA</i> ( $\Delta$ <i>araBAD(aa1-73)</i> )                                                                                                                  | Lab collection |
| TH13659 | LT2 $\Delta$ <i>araBAD1005::FCF</i><br><i>PflhDC5451::Tn10dTc[del-25]</i>                                                                                                                | Lab collection |

|         |                                                                                                                 |                |
|---------|-----------------------------------------------------------------------------------------------------------------|----------------|
|         | <i>flhC5213::MudJ</i>                                                                                           |                |
| TH13751 | LT2 $\Delta$ <i>araBAD1005::FCF flhC5213::MudJ</i>                                                              | Lab collection |
| TH13752 | LT2 $\Delta$ <i>araBAD1005::FCF fliL5100::MudJ</i>                                                              | Lab collection |
| TH13919 | LT2 $\Delta$ <i>araBAD1005::FCF PflhDC5451::Tn10dTc[del-25] fliL5100::MudJ</i>                                  | Lab collection |
| TH14571 | LT2 $\Delta$ <i>araBAD1005::FCF fljB5001::MudJ <math>\Delta</math>hin-5718::FRT</i>                             | Lab collection |
| TH14845 | LT2 $\Delta$ <i>araBAD1005::FCF PflhDC5451::Tn10dTc[del-25] fljB5001::MudJ <math>\Delta</math>hin-5718::FRT</i> | Lab collection |
| TH16339 | LT2 $\Delta$ <i>araBAD1065::hilD<sup>+</sup></i>                                                                | This study     |
| TH16385 | LT2 $\Delta$ <i>araBAD1065::hilD<sup>+</sup> fliL5100::MudJ</i>                                                 | This study     |
| TH16386 | LT2 $\Delta$ <i>araBAD1065::hilD<sup>+</sup> flhC5213::MudJ</i>                                                 | This study     |
| TH16423 | LT2 $\Delta$ <i>araBAD1065::hilD<sup>+</sup> fljB5001::MudJ <math>\Delta</math>hin-5718::FRT</i>                | This study     |

**Supplemental Table 2: Oligonucleotide sequences used for quantitative real time PCR analysis of gene expression in *Salmonella*.**

| Primer name | 5'-3' sequence            |
|-------------|---------------------------|
| flhDC-fw    | GTAGGCAGCTTTGCGTGTAG      |
| flhDC-rv    | TCCAGCAGTTGTGGAATAATATCG  |
| gmk-fw      | TTGCAGAAATGAGCCATTACGCCG  |
| gmk-rv      | GACG TTCAGCGCGAATGATGGTTT |
| gyrB-fw     | CTGCTCAAAGAGCTGGTGTATCA   |
| gyrB-rv     | AGCGCGTTACAGTCTGCTCAT     |
| rflM-fw     | TCTCAACGATGCCTTACCCGAACA  |
| rflM-rv     | GCAAGCTCATGTAAAGGCGTGTGT  |
| rpoB-fw     | CAACCTGTTTCGTACGTATCGAC   |
| rpoB-rv     | CAGCTCCATCTGCAGTTTGTTG    |
| rpoD-fw     | CAACAGTATGCGCGTGATGAT     |
| rpoD-rv     | CGACGCAGAGCTTCATGATC      |

### **Supplemental Figure S1: HilD increases *rflM* expression via *flhDC***

**A.** Quantitative real-time PCR comparing *rflM* mRNA levels of strain TH6701 ( $P_{ara}::tetRA$ ) and TH16339 ( $P_{ara}::hilD^+$ ) upon induction by arabinose. The mRNA levels were analyzed from at least three independent biological samples. Biological replicates are shown as individual data points (diamonds) in all figures.

**B.** Relative *rflM* expression analyzed in a  $\beta$ -galactosidase assay using an *rflM-lac* reporter system described above. *rflM* gene expression was analyzed in EM3 ( $\Delta araBAD::hilD^+ \Delta invH-sprB::FCF rflM::MudJ$ , labeled 2), EM20 ( $\Delta araBAD::hilD^+ rtsB::TPOP \Delta invH-sprB::FCF rflM::MudJ$ , labeled 3), EM50 ( $\Delta araBAD::hilD^+ rtsB::TPOP \Delta flhDC \Delta invH-sprB::FCF rflM::MudJ$ , labeled 4). *hilD* transcription was induced by the addition of 0.2% arabinose. Expression was normalized to the wild-type control EM126 ( $\Delta araBAD::tetRA \Delta invH-sprB::FCF rflM::MudJ$ , labeled 1). Six independent biological replicates were tested and error bars represent the standard error of the mean.

### **Supplemental Figure S2: Effect of HilA on flagellar gene expression.**

The effect of overproduced *hilA* under the control of the *araBAD* promoter on the expression of the flagellar genes *flhC* (class 1), *fliL* (class 2) and *fljB* (class 3) in a  $\beta$ -galactosidase assay. Expression of HilA was induced by addition of 0.2% arabinose in the following strains: (i) *flhC* (class 1): EM517 ( $P_{ara}::FRT flhC::MudJ$ ), EM1011 ( $P_{ara}::hilA^+ flhC::MudJ$ ); (ii) *fliL* (class 2): EM1018 ( $P_{ara}::FRT fliL::MudJ$ ), EM1019 ( $P_{ara}::hilA^+ fliL::MudJ$ ); and (iii) *fljB* (class 3): EM1010 ( $P_{ara}::FRT fljB::MudJ$ ), EM1009 ( $P_{ara}::hilA^+ fljB::MudJ$ ). Biological replicates are shown as individual data points (diamonds).

### **Supplemental Figure S3: HilD and RtsB act on different promoters to activate and repress *flhDC* operon transcription**

**A.** RtsB and HilD were simultaneously induced by addition of arabinose and anhydrotetracycline (left panel); HilD was induced by addition of arabinose (middle panel); or RtsB was induced by addition of anhydrotetracycline (right panel). Expression of *flhD-lac* was monitored in a  $\beta$ -galactosidase assay. A (+\*) indicates the presence of the *rtsB* gene, however *rtsAB* is likely not expressed due to the absence of its activator HilD. Strains used were EM827 ( $\Delta araBAD::FRT$  *flhC::MudJ*  $\Delta invH-sprB::FCF$ ), EM937 ( $\Delta araBAD::FRT$  *flhC::MudJ*  $\Delta invH-sprB::FCF$  *rtsB::T-POP*); EM4 ( $\Delta araBAD::hilD^+$  *flhC::MudJ*  $\Delta invH-sprB::FCF$ ); EM43 ( $\Delta araBAD::hilD^+$  *flhC::MudJ*  $\Delta invH-sprB::FCF$  *rtsB::T-POP*). Biological replicates are shown as individual data points (diamonds) in all figures.

**B.** *flhDC* transcription from individual *flhDC* promoters under conditions when HilD or RtsB were overproduced was analyzed using a (*luxDCABE-Km*)-*flhDC* promoter fusion. As outlined in detail in Figure 1E, the entire *flhDC* promoter region with GTTGGT -10 box mutations of five of the six known transcriptional *flhDC* start sites was fused to a *luxCDBAE*-kanamycin cassette. Luminescence is shown relative to  $P_{ara}::FRT$   $P_{flhDC}(P1-6)$ -*luxCDBAE*-Km- $P_{flhD+C+}$ . Strains used were EM706-712 ( $P_{ara}::FRT$ ), EM713-719 ( $P_{ara}::hilD^+$ ) and EM1048-1054 ( $P_{ara}::rtsB^+$ ). Error bars represent the standard error of the mean. Data were analyzed by the Student's *t* test. Stars indicate the gene expression levels that differed significantly with \*\* ( $P < 0.01$ ).

# Supplemental Figure S1

## A

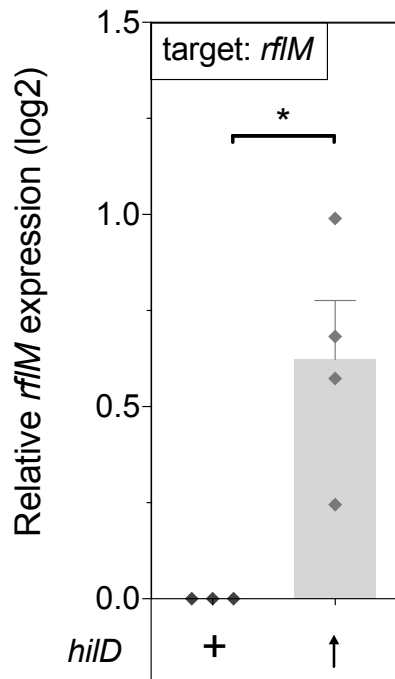

## B

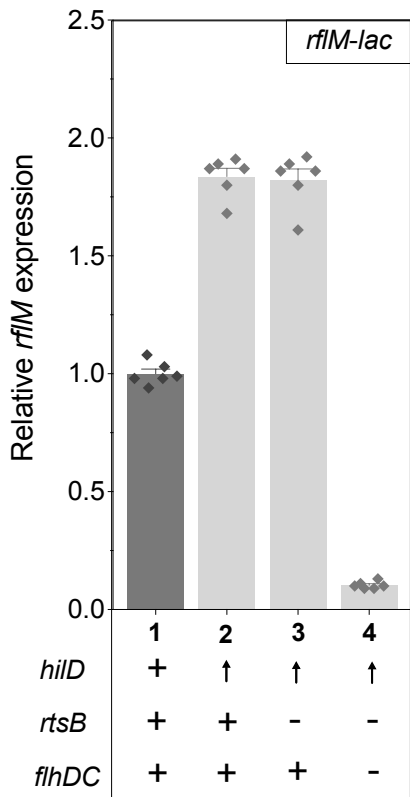



# Supplemental Figure S2

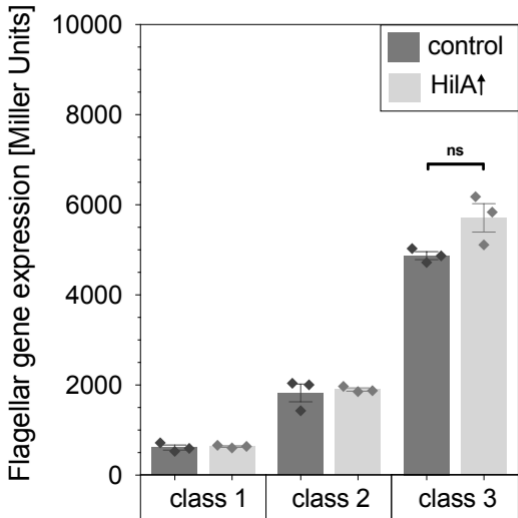

# Supplemental Figure S3

## A

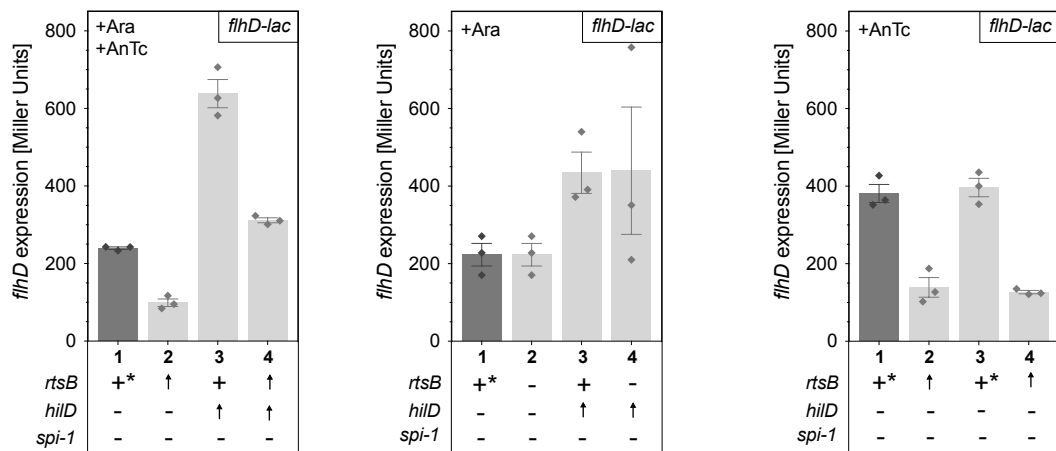

## B

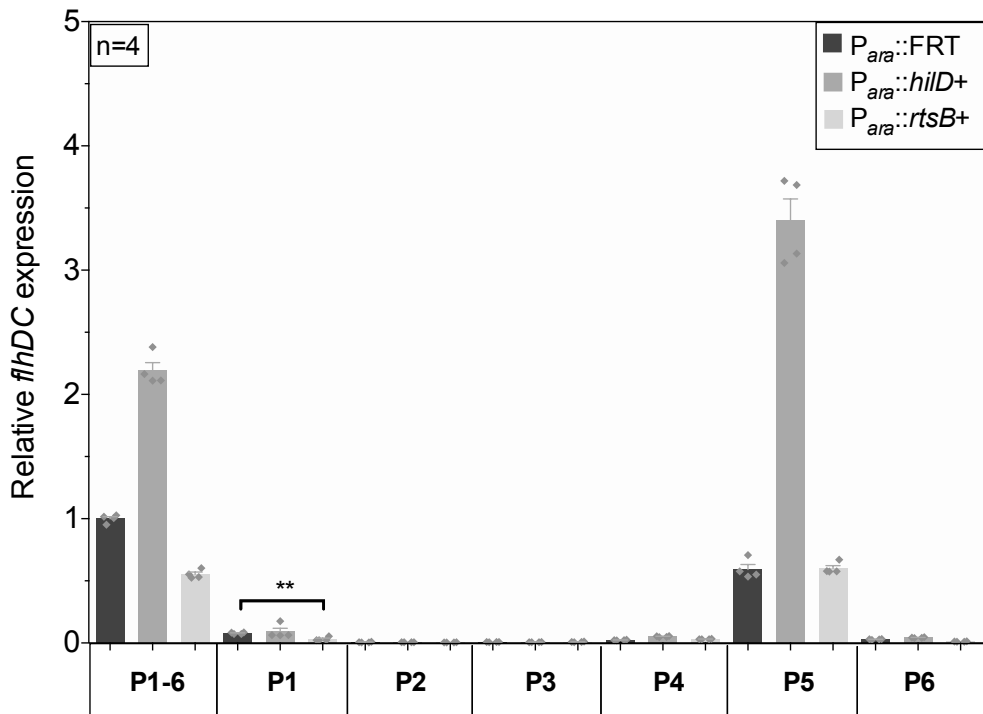

Supplement: JB.01438-13_zjb999093095so1.pdf [file JB.01438-13_zjb999093095so1.pdf]
